# Supplementary material for: Why Being ‘Stressed’ Is ‘Desserts’ in Reverse—The Effect of Acute Psychosocial Stress on Food Pleasure and Food Choice
Source: MDPI journal article supplement (doi:10.3390/foods11121756), 2022-06-15
Supplement: s1 [file s1]

# Supplementary materials

**Table S1.** Images used in the Leeds Food Preference Questionnaire. There were four images grouped together to represent each of four food categories. HFSW: High-fat sweet, LFSW: Low-fat sweet, HFSA: High-fat savory, LFSA: Low-fat savory

| Food category |                                                                                     |                                                                                     |                                                                                      |                                                                                       |
|---------------|-------------------------------------------------------------------------------------|-------------------------------------------------------------------------------------|--------------------------------------------------------------------------------------|---------------------------------------------------------------------------------------|
| HFSW          |    |    |    |    |
| LFSW          |    |    |    |    |
| HFSA          |   |  |   |   |
| LFSA          |  |  |  |  |

**Table S2.** Mean ( $\pm$ SD) GSR amplitude levels and peaks/min at baseline, during performance of the cognitive task and during performance of the Leeds Food Preference Questionnaire.

| GSR measures                               | Condition           |                     | Result of linear mixed effects ANOVA |         |
|--------------------------------------------|---------------------|---------------------|--------------------------------------|---------|
|                                            | Relaxed             | Stressed            | F value                              | P value |
| Baseline, mean ( $\pm$ SD) amplitude       | 9.69 ( $\pm$ 3.91)  | 9.63 ( $\pm$ 3.83)  | 0.021                                | 0.886   |
| Cognitive task, mean ( $\pm$ SD) amplitude | 13.13 ( $\pm$ 4.29) | 13.63 ( $\pm$ 4.00) | 0.169                                | 0.686   |
| Cognitive task, peaks/min ( $\pm$ SD)      | 4.51 ( $\pm$ 1.96)  | 3.65 ( $\pm$ 1.54)  | 4.112                                | 0.053   |
| LFPQ, mean ( $\pm$ SD) amplitude           | 13.36 ( $\pm$ 4.40) | 13.53 ( $\pm$ 3.98) | 0.039                                | 0.844   |
| LFPQ, peaks/min ( $\pm$ SD)                | 2.58 ( $\pm$ 1.38)  | 2.09 ( $\pm$ 1.04)  | 1.714                                | 0.204   |

LFPQ: Leeds Food Preference Questionnaire
